# Supplementary material for: Mycobacterium terramassiliense, Mycobacterium rhizamassiliense and Mycobacterium numidiamassiliense sp. nov., three new Mycobacterium simiae complex species cultured from plant roots
Source: PubMed Central journal article supplement (PMC6006331; doi:10.1038/s41598-018-27629-1), 2018-06-18
Supplement: 41598_2018_27629_MOESM2_ESM.pdf [file 41598_2018_27629_MOESM2_ESM.pdf]

***Mycobacterium terramassiliense*, *Mycobacterium rhizamassiliense* and *Mycobacterium numidiamassiliense* sp. nov., three new *Mycobacterium simiae* complex species cultured from plant roots.**

A. Bouam<sup>1</sup>, N. Armstrong<sup>1</sup>, A. Levasseur<sup>1</sup> and M. Drancourt\*<sup>1</sup>

**Supplementary file 1**

Details of OriC regions predicted in the genome of strains AB308, AB215 and AB57.

***Mycobacterium terramassiliense* :**

|                              |                                                                                                                                                                                                                                                                                                                                                                                                                                                                                                                                                                                                                                    |
|------------------------------|------------------------------------------------------------------------------------------------------------------------------------------------------------------------------------------------------------------------------------------------------------------------------------------------------------------------------------------------------------------------------------------------------------------------------------------------------------------------------------------------------------------------------------------------------------------------------------------------------------------------------------|
| Genome size                  | 6029590 nt                                                                                                                                                                                                                                                                                                                                                                                                                                                                                                                                                                                                                         |
| Genome GC content            | 0.6839                                                                                                                                                                                                                                                                                                                                                                                                                                                                                                                                                                                                                             |
| DnaA box distribution        | <a href="#">[DnaA box distribution]</a>                                                                                                                                                                                                                                                                                                                                                                                                                                                                                                                                                                                            |
| OriC length                  | 647 nt                                                                                                                                                                                                                                                                                                                                                                                                                                                                                                                                                                                                                             |
| OriC AT content              | 0.3184                                                                                                                                                                                                                                                                                                                                                                                                                                                                                                                                                                                                                             |
| The number of DnaA box       | 3                                                                                                                                                                                                                                                                                                                                                                                                                                                                                                                                                                                                                                  |
| The location of oriC region  | 3483469..3484115 nt                                                                                                                                                                                                                                                                                                                                                                                                                                                                                                                                                                                                                |
| The location of dnaA gene    | -                                                                                                                                                                                                                                                                                                                                                                                                                                                                                                                                                                                                                                  |
| The extremes of GC disparity | 3431648 nt (minimum), 6022463 nt (maximum)                                                                                                                                                                                                                                                                                                                                                                                                                                                                                                                                                                                         |
| The extremes of AT disparity | 5893509 nt (minimum), 3960 nt (maximum)                                                                                                                                                                                                                                                                                                                                                                                                                                                                                                                                                                                            |
| The extremes of RY disparity | 3431573 nt (minimum), 6025419 nt (maximum)                                                                                                                                                                                                                                                                                                                                                                                                                                                                                                                                                                                         |
| The extremes of MK disparity | 6022453 nt (minimum), 3387045 nt (maximum)                                                                                                                                                                                                                                                                                                                                                                                                                                                                                                                                                                                         |
| Note                         | Note that the E. coli perfect DnaA box (ttatccaca) was searched for with no more than two mismatches. <a href="#">[Gene list (zcurve1.02)]</a>                                                                                                                                                                                                                                                                                                                                                                                                                                                                                     |
| Z-curves                     | <a href="#">[Figure1]</a> <a href="#">[Figure2]</a>                                                                                                                                                                                                                                                                                                                                                                                                                                                                                                                                                                                |
| OriC Sequence                | The DnaA boxes identified in the below sequence are capitalized and also marked in bold, if any.                                                                                                                                                                                                                                                                                                                                                                                                                                                                                                                                   |
|                              | <pre> catggtcgtcgatatgcacggcccgccgagccgggacatcgtcgacaaggcgatcaccgc gctgctgaacctcgaacaccgcgccagggcgccgagccgcgagcggtgacggcgc cggcatcctgattcaggtgccggacgcgttctgcgaggtcgtggatttcaactgcc cgctcgggcagctacgccaccggtatcgcttcttccgcagtcgtcgaaggacgccgc gaccgcgtgcccgc<b>GGTGGAGAA</b>gatcgccgagtcgagggcctgcaggtcatcggctg gcgcaactgcccacggacgactcgtcgtgggtgcctgtcccgcgacgcgatccac ggtccggcaggtgttcatgacgggcgctccgggatggcgtggagcgacgcgctactg ggtgcgcaagcgcgccgagcacgagctgggcaccaagggcccgggccaggatggcccggg tcgcgaaaccgttacttccaagccttccggtcagacct<b>TCATCTACA</b>agggcatgct gaccaccccgagctcaaggcgttttaccttgacctgcaagacgatcggctgaccagcgc </pre> |

gctgggcatcgtgcactcccgc**TTCTCCACG**aacaccttcccgtcgt

*Mycobacterium numidiamassiliense*

The information of genome and oriC region

|                              |                                                                                                                                                                                                                                                                                                                                                                                                                                                                                                                                                                                                                                                    |
|------------------------------|----------------------------------------------------------------------------------------------------------------------------------------------------------------------------------------------------------------------------------------------------------------------------------------------------------------------------------------------------------------------------------------------------------------------------------------------------------------------------------------------------------------------------------------------------------------------------------------------------------------------------------------------------|
| Genome size                  | 6248949 nt                                                                                                                                                                                                                                                                                                                                                                                                                                                                                                                                                                                                                                         |
| Genome GC content            | 0.6585                                                                                                                                                                                                                                                                                                                                                                                                                                                                                                                                                                                                                                             |
| DnaA box distribution        | [ <a href="#">DnaA box distribution</a> ]                                                                                                                                                                                                                                                                                                                                                                                                                                                                                                                                                                                                          |
| OriC length                  | 534 nt                                                                                                                                                                                                                                                                                                                                                                                                                                                                                                                                                                                                                                             |
| OriC AT content              | 0.3914                                                                                                                                                                                                                                                                                                                                                                                                                                                                                                                                                                                                                                             |
| The number of DnaA box       | 6                                                                                                                                                                                                                                                                                                                                                                                                                                                                                                                                                                                                                                                  |
| The location of oriC region  | 1772264..1772797 nt                                                                                                                                                                                                                                                                                                                                                                                                                                                                                                                                                                                                                                |
| The location of dnaA gene    | -                                                                                                                                                                                                                                                                                                                                                                                                                                                                                                                                                                                                                                                  |
| The extremes of GC disparity | 1848671 nt (minimum), 5310514 nt (maximum)                                                                                                                                                                                                                                                                                                                                                                                                                                                                                                                                                                                                         |
| The extremes of AT disparity | 5327831 nt (minimum), 1897876 nt (maximum)                                                                                                                                                                                                                                                                                                                                                                                                                                                                                                                                                                                                         |
| The extremes of RY disparity | 1848674 nt (minimum), 5246343 nt (maximum)                                                                                                                                                                                                                                                                                                                                                                                                                                                                                                                                                                                                         |
| The extremes of MK disparity | 5328449 nt (minimum), 1857179 nt (maximum)                                                                                                                                                                                                                                                                                                                                                                                                                                                                                                                                                                                                         |
| Note                         | Note that the E. coli perfect DnaA box (ttatccaca) was searched for with no more than two mismatches. [ <a href="#">Gene list (zcurve1.02)</a> ]                                                                                                                                                                                                                                                                                                                                                                                                                                                                                                   |
| Z-curves                     | [ <a href="#">Figure1</a> ] [ <a href="#">Figure2</a> ]                                                                                                                                                                                                                                                                                                                                                                                                                                                                                                                                                                                            |
| OriC Sequence                | The DnaA boxes identified in the below sequence are capitalized and also marked in bold, if any.                                                                                                                                                                                                                                                                                                                                                                                                                                                                                                                                                   |
|                              | tagcgggtagctgaaagggccac <b>TGTTCATAA</b> cactgtgcatcgtg <b>TGTGCATAT</b> ccttc<br>gacacctgtgttgagtgggt <b>TGTGGAGAA</b> cc <b>TGTGGATTA</b> aaacgcggcggtgaagcatc<br>cgtgcagatacgcgcagtacaccactgcacatttgg <b>TGTGGAGAA</b> caattcgcctcggcgt<br>gtcgggccagggttactgcgtcgggctgttggctt <b>TCACCCACA</b> tttctgcgcgagttacg<br>agccggttaaggcgccccatgcaccccggtcaccgaaatagttcgcacaggtccgcccgcac<br>cgcgcgtctacctagccggctctgagcgtcacagagcgccaaacgagttccggcggcca<br>ccctcaggggocggocgggacaaagcaaacagtgctcagagtttagctgtccgcgacgacgt<br>ccagcgtgaactccacgcttgacctccgggtgcaggtgcaccgacaccgagtgccgaccga<br>tggccttgatgtgcgccttgggcagccggacgatgcgcttgtccaggttcgggc |

The information of genome and oriC region

|                              |                                                                                                                                                                                                                                                                                                                                                                                                                                                                                                                                                                                                                                                                                                                                                                                                                                                                                                                                                                                                                                     |
|------------------------------|-------------------------------------------------------------------------------------------------------------------------------------------------------------------------------------------------------------------------------------------------------------------------------------------------------------------------------------------------------------------------------------------------------------------------------------------------------------------------------------------------------------------------------------------------------------------------------------------------------------------------------------------------------------------------------------------------------------------------------------------------------------------------------------------------------------------------------------------------------------------------------------------------------------------------------------------------------------------------------------------------------------------------------------|
| Genome size                  | 6248949 nt                                                                                                                                                                                                                                                                                                                                                                                                                                                                                                                                                                                                                                                                                                                                                                                                                                                                                                                                                                                                                          |
| Genome GC content            | 0.6585                                                                                                                                                                                                                                                                                                                                                                                                                                                                                                                                                                                                                                                                                                                                                                                                                                                                                                                                                                                                                              |
| DnaA box distribution        | [ <a href="#">DnaA box distribution</a> ]                                                                                                                                                                                                                                                                                                                                                                                                                                                                                                                                                                                                                                                                                                                                                                                                                                                                                                                                                                                           |
| OriC length                  | 923 nt                                                                                                                                                                                                                                                                                                                                                                                                                                                                                                                                                                                                                                                                                                                                                                                                                                                                                                                                                                                                                              |
| OriC AT content              | 0.3792                                                                                                                                                                                                                                                                                                                                                                                                                                                                                                                                                                                                                                                                                                                                                                                                                                                                                                                                                                                                                              |
| The number of DnaA box       | 4                                                                                                                                                                                                                                                                                                                                                                                                                                                                                                                                                                                                                                                                                                                                                                                                                                                                                                                                                                                                                                   |
| The location of oriC region  | 1846020..1846942 nt                                                                                                                                                                                                                                                                                                                                                                                                                                                                                                                                                                                                                                                                                                                                                                                                                                                                                                                                                                                                                 |
| The location of dnaA gene    | -                                                                                                                                                                                                                                                                                                                                                                                                                                                                                                                                                                                                                                                                                                                                                                                                                                                                                                                                                                                                                                   |
| The extremes of GC disparity | 1848671 nt (minimum), 5310514 nt (maximum)                                                                                                                                                                                                                                                                                                                                                                                                                                                                                                                                                                                                                                                                                                                                                                                                                                                                                                                                                                                          |
| The extremes of AT disparity | 5327831 nt (minimum), 1897876 nt (maximum)                                                                                                                                                                                                                                                                                                                                                                                                                                                                                                                                                                                                                                                                                                                                                                                                                                                                                                                                                                                          |
| The extremes of RY disparity | 1848674 nt (minimum), 5246343 nt (maximum)                                                                                                                                                                                                                                                                                                                                                                                                                                                                                                                                                                                                                                                                                                                                                                                                                                                                                                                                                                                          |
| The extremes of MK disparity | 5328449 nt (minimum), 1857179 nt (maximum)                                                                                                                                                                                                                                                                                                                                                                                                                                                                                                                                                                                                                                                                                                                                                                                                                                                                                                                                                                                          |
| Note                         | Note that the E. coli perfect DnaA box (ttatccaca) was searched for with no more than two mismatches. [ <a href="#">Gene list (zcurve1.02)</a> ]                                                                                                                                                                                                                                                                                                                                                                                                                                                                                                                                                                                                                                                                                                                                                                                                                                                                                    |
| Z-curves                     | [ <a href="#">Figure1</a> ] [ <a href="#">Figure2</a> ]                                                                                                                                                                                                                                                                                                                                                                                                                                                                                                                                                                                                                                                                                                                                                                                                                                                                                                                                                                             |
| OriC Sequence                | The DnaA boxes identified in the below sequence are capitalized and also marked in bold, if any.                                                                                                                                                                                                                                                                                                                                                                                                                                                                                                                                                                                                                                                                                                                                                                                                                                                                                                                                    |
|                              | <pre> aagcgcgcgcggcccttgccggcgcgaccggacacgatggcaccgccggcgcggggtacg catgcgcagacggaagccgtgcaacggcggcggcgccggttggtcggctgaaaggtccg cttgcccttgccacggcattctcctcgggtctgtcttgctcgaagctttcccagccatcc ggccgcccgcggttttcaccgaatcgccggctcgatcgaaaagtgggtcttgctactggccgg cgcggttccccctgacataacctgggtcgcagccgcacatcgccgactttcgggcgactgtatg agggtactgatgaggattcgccctgggtcaaaacttggcctgccccaacggcaccagcggaac tgcgacccccgaaccggcaccgcgcggcggaaaacgaaaaatgccccacggcagcttaaa gaagccgactggaatgcagcggaaacgggttggcagccgcacggaaaactgtagcttcggg caatgccggtttcagacccccagcggcgcaagacaacgaagcaaggatggcggatcaactgg ctgtctaggtgaacttctcgaggttccctccagcacggagatcgcgagccgtcgccggta ggctgcggcccgtatacgatcacc<b>CTGTCCACA</b>cc<b>TGTGTATAA</b>cta<b>TGTGGACAG</b>atgc ttcgtcgcgaagcgtgggttagctcaagcccagagtttgcgagaaccagggagatgcgt cgttgaccgatgacccccggttcgggctttaccagcgtatggaatgcagtcggttccgaac tcaatggcgcagccagcgcggacgggtctcaccaccaatcgaaacgggt<b>TCTGGACAA</b>cccgc taaccctcagcaacgagccctggctgaatctcgttcagccactcaccatcgtcgaggggt ttgccctgctgtctgtgcccagac </pre> |

The information of genome and oriC region

|                              |                                                                                                                                                                                                                                                                                                                                                                                                                                                                                                                                                                                             |
|------------------------------|---------------------------------------------------------------------------------------------------------------------------------------------------------------------------------------------------------------------------------------------------------------------------------------------------------------------------------------------------------------------------------------------------------------------------------------------------------------------------------------------------------------------------------------------------------------------------------------------|
| Genome size                  | 6248949 nt                                                                                                                                                                                                                                                                                                                                                                                                                                                                                                                                                                                  |
| Genome GC content            | 0.6585                                                                                                                                                                                                                                                                                                                                                                                                                                                                                                                                                                                      |
| DnaA box distribution        | [ <a href="#">DnaA box distribution</a> ]                                                                                                                                                                                                                                                                                                                                                                                                                                                                                                                                                   |
| OriC length                  | 489 nt                                                                                                                                                                                                                                                                                                                                                                                                                                                                                                                                                                                      |
| OriC AT content              | 0.4376                                                                                                                                                                                                                                                                                                                                                                                                                                                                                                                                                                                      |
| The number of DnaA box       | 5                                                                                                                                                                                                                                                                                                                                                                                                                                                                                                                                                                                           |
| The location of oriC region  | 1947253..1947741 nt                                                                                                                                                                                                                                                                                                                                                                                                                                                                                                                                                                         |
| The location of dnaA gene    | -                                                                                                                                                                                                                                                                                                                                                                                                                                                                                                                                                                                           |
| The extremes of GC disparity | 1848671 nt (minimum), 5310514 nt (maximum)                                                                                                                                                                                                                                                                                                                                                                                                                                                                                                                                                  |
| The extremes of AT disparity | 5327831 nt (minimum), 1897876 nt (maximum)                                                                                                                                                                                                                                                                                                                                                                                                                                                                                                                                                  |
| The extremes of RY disparity | 1848674 nt (minimum), 5246343 nt (maximum)                                                                                                                                                                                                                                                                                                                                                                                                                                                                                                                                                  |
| The extremes of MK disparity | 5328449 nt (minimum), 1857179 nt (maximum)                                                                                                                                                                                                                                                                                                                                                                                                                                                                                                                                                  |
| Note                         | Note that the E. coli perfect DnaA box (ttatccaca) was searched for with no more than two mismatches. [ <a href="#">Gene list (zcurve1.02)</a> ]                                                                                                                                                                                                                                                                                                                                                                                                                                            |
| Z-curves                     | [ <a href="#">Figure1</a> ] [ <a href="#">Figure2</a> ]                                                                                                                                                                                                                                                                                                                                                                                                                                                                                                                                     |
| OriC Sequence                | The DnaA boxes identified in the below sequence are capitalized and also marked in bold, if any.                                                                                                                                                                                                                                                                                                                                                                                                                                                                                            |
|                              | agaagaacaacttagagatctaagtatcagtattaaggcctgtgcattctggggacagc<br>ctggcttctgtgcagctaggacctcgatggggg <b>TGTGGATGA</b> cagcgcgcgtggctgtgt<br>gcacggtggtgagcggg <b>TGGGGATGA</b> atgacagatgtacacggcggcgcggt <b>TCATCCAC</b><br><b>G</b> gtggtttgctgct <b>TTTTCCACA</b> gcgctgccacaccgtcaggg <b>TGTGGCTGA</b> tgtgac<br>agccgtgcgagaagtTTTTTgaaaaagtgtgactcgtgagtttcaaatacagcgttggg<br>gcgctggcggatgagagtcgtgagttctttaacgtggtcgaacacctcacgtcgcctcggc<br>catctcggacaagatctttcgttgccgacatacatgaccgtggtgtggtcgcggccgaatgc<br>ctgtccgatcttcggcagcagaggtcagtgagttcgcggcacaggtacatcgcgatctg<br>ccgcgactg |

*Mycobacterium rhizamassiliense*:

|                              |                                                                                                                                                                                                                                                                                                                                                                                                                                                                                                                                                                                                                                                                                     |
|------------------------------|-------------------------------------------------------------------------------------------------------------------------------------------------------------------------------------------------------------------------------------------------------------------------------------------------------------------------------------------------------------------------------------------------------------------------------------------------------------------------------------------------------------------------------------------------------------------------------------------------------------------------------------------------------------------------------------|
| Genome size                  | 6015465 nt                                                                                                                                                                                                                                                                                                                                                                                                                                                                                                                                                                                                                                                                          |
| Genome GC content            | 0.6722                                                                                                                                                                                                                                                                                                                                                                                                                                                                                                                                                                                                                                                                              |
| DnaA box distribution        | [ <a href="#">DnaA box distribution</a> ]                                                                                                                                                                                                                                                                                                                                                                                                                                                                                                                                                                                                                                           |
| OriC length                  | 488 nt                                                                                                                                                                                                                                                                                                                                                                                                                                                                                                                                                                                                                                                                              |
| OriC AT content              | 0.4344                                                                                                                                                                                                                                                                                                                                                                                                                                                                                                                                                                                                                                                                              |
| The number of DnaA box       | 4                                                                                                                                                                                                                                                                                                                                                                                                                                                                                                                                                                                                                                                                                   |
| The location of oriC region  | 1721223..1721710 nt                                                                                                                                                                                                                                                                                                                                                                                                                                                                                                                                                                                                                                                                 |
| The location of dnaA gene    | -                                                                                                                                                                                                                                                                                                                                                                                                                                                                                                                                                                                                                                                                                   |
| The extremes of GC disparity | 1721273 nt (minimum), 4895128 nt (maximum)                                                                                                                                                                                                                                                                                                                                                                                                                                                                                                                                                                                                                                          |
| The extremes of AT disparity | 4894759 nt (minimum), 644303 nt (maximum)                                                                                                                                                                                                                                                                                                                                                                                                                                                                                                                                                                                                                                           |
| The extremes of RY disparity | 1719935 nt (minimum), 4506867 nt (maximum)                                                                                                                                                                                                                                                                                                                                                                                                                                                                                                                                                                                                                                          |
| The extremes of MK disparity | 4895128 nt (minimum), 1705512 nt (maximum)                                                                                                                                                                                                                                                                                                                                                                                                                                                                                                                                                                                                                                          |
| Note                         | Note that the E. coli perfect DnaA box (ttatccaca) was searched for with no more than two mismatches. [ <a href="#">Gene list (zcurve1.02)</a> ]                                                                                                                                                                                                                                                                                                                                                                                                                                                                                                                                    |
| Z-curves                     | [ <a href="#">Figure1</a> ] [ <a href="#">Figure2</a> ]                                                                                                                                                                                                                                                                                                                                                                                                                                                                                                                                                                                                                             |
| OriC Sequence                | The DnaA boxes identified in the below sequence are capitalized and also marked in bold, if any.<br>agcgtcccttcacctacaaaaatctcagtcagtggttagccgcgcccccgctagcgtg<br>gggccccgaaacggggagtcgaagaacaaccgtagatcgtccggggccatcttgaaagc<br>taatcgcggaaggccgacaaccgcagtgatcgagacgcttgtaagccccctggggacgaggc<br>gtccccaaacctgttcttcaaagaagaaacgacgaagagatctcagtaccagtattaagg<br>gctgtgcaagt <b>TGGGGAGAA</b> gtgcaactcctgtgtagctaggggagcggcgggg <b>TGTGGA</b><br><b>TGA</b> cgcggtgcgcaactgtgtgtcccgtgtgggtcgac <b>TGGGGATGA</b> attacagatgtac<br>accgatggccgattactgcacgggggttgcgtggt <b>TTTTGCACA</b> agcctgcgcatag<br>ccagcgtgtggctggtgtgacagacgtgtgggaagttttttgaaaaagtgtgactcgtgg<br>ggtgcaaa |

The information of genome and oriC region

|                              |                                                                                                                                                                                                                                                                                                                                                                                                                                                                                                                                                                                                                                                                                                                                                                                                                                                                                                   |
|------------------------------|---------------------------------------------------------------------------------------------------------------------------------------------------------------------------------------------------------------------------------------------------------------------------------------------------------------------------------------------------------------------------------------------------------------------------------------------------------------------------------------------------------------------------------------------------------------------------------------------------------------------------------------------------------------------------------------------------------------------------------------------------------------------------------------------------------------------------------------------------------------------------------------------------|
| Genome size                  | 6015465 nt                                                                                                                                                                                                                                                                                                                                                                                                                                                                                                                                                                                                                                                                                                                                                                                                                                                                                        |
| Genome GC content            | 0.6722                                                                                                                                                                                                                                                                                                                                                                                                                                                                                                                                                                                                                                                                                                                                                                                                                                                                                            |
| DnaA box distribution        | [ <a href="#">DnaA box distribution</a> ]                                                                                                                                                                                                                                                                                                                                                                                                                                                                                                                                                                                                                                                                                                                                                                                                                                                         |
| OriC length                  | 793 nt                                                                                                                                                                                                                                                                                                                                                                                                                                                                                                                                                                                                                                                                                                                                                                                                                                                                                            |
| OriC AT content              | 0.3670                                                                                                                                                                                                                                                                                                                                                                                                                                                                                                                                                                                                                                                                                                                                                                                                                                                                                            |
| The number of DnaA box       | 3                                                                                                                                                                                                                                                                                                                                                                                                                                                                                                                                                                                                                                                                                                                                                                                                                                                                                                 |
| The location of oriC region  | 1723229..1724021 nt                                                                                                                                                                                                                                                                                                                                                                                                                                                                                                                                                                                                                                                                                                                                                                                                                                                                               |
| The location of dnaA gene    | -                                                                                                                                                                                                                                                                                                                                                                                                                                                                                                                                                                                                                                                                                                                                                                                                                                                                                                 |
| The extremes of GC disparity | 1721273 nt (minimum), 4895128 nt (maximum)                                                                                                                                                                                                                                                                                                                                                                                                                                                                                                                                                                                                                                                                                                                                                                                                                                                        |
| The extremes of AT disparity | 4894759 nt (minimum), 644303 nt (maximum)                                                                                                                                                                                                                                                                                                                                                                                                                                                                                                                                                                                                                                                                                                                                                                                                                                                         |
| The extremes of RY disparity | 1719935 nt (minimum), 4506867 nt (maximum)                                                                                                                                                                                                                                                                                                                                                                                                                                                                                                                                                                                                                                                                                                                                                                                                                                                        |
| The extremes of MK disparity | 4895128 nt (minimum), 1705512 nt (maximum)                                                                                                                                                                                                                                                                                                                                                                                                                                                                                                                                                                                                                                                                                                                                                                                                                                                        |
| Note                         | Note that the E. coli perfect DnaA box (ttatccaca) was searched for with no more than two mismatches. [ <a href="#">Gene list (zcurve1.02)</a> ]                                                                                                                                                                                                                                                                                                                                                                                                                                                                                                                                                                                                                                                                                                                                                  |
| Z-curves                     | [ <a href="#">Figure1</a> ] [ <a href="#">Figure2</a> ]                                                                                                                                                                                                                                                                                                                                                                                                                                                                                                                                                                                                                                                                                                                                                                                                                                           |
| OriC Sequence                | The DnaA boxes identified in the below sequence are capitalized and also marked in bold, if any.                                                                                                                                                                                                                                                                                                                                                                                                                                                                                                                                                                                                                                                                                                                                                                                                  |
|                              | cgacgcacatctccctgggttctcgcaaactctgggctgagctacaacctcgctgtgacgaca<br>aagcaa <b>CTGTCCACA</b> tag <b>TTATACACA</b> gg <b>TGTGGACAG</b> gatgatcgatatacgggcccga<br>cctaccggcgacggctcgcgatctccgcgctggaggcaaccccgtggaggtcgcctagac<br>agctagtcgatccgccatcctcgttctggtcatgcccgttgacagtctgaaacggcat<br>tgcccgaagctaacagttttccgaccggctgccaacagttcggctgcattccaatcggct<br>tctctagcctccttgggcgctctttctctcggccgcccggacgggaggccgagcggcctg<br>cctgagcacgggtattttccggtgacgagtggtagtcgcccgttgccaggacaagttt<br>gaccaggcgaagtgtcatcagtaacctcatacagtcgcccgaagtcggcgatacggctg<br>cgacccgagccatctgtgccccgaccgcccggccagcagcagttagaccactttccgac<br>tgaccccggggttgcaaacgcgagcggccggatggcaatgcgagacacaccgaggagaa<br>tgccgtggccaagggcaagcggacctttcagccgaataaccggcgccgagcccgtgtgca<br>cggcttccgtctgcgatgcgtacccgcgcgggctgcccattgtgtcgggtcggcgtcg<br>caagggtcgcgcgcgctttctgcctgatccgcgccgacaggttcgtgggcggtgctttc<br>ggcacgcaaccgt |

The information of genome and oriC region

|                              |                                                                                                                                                  |
|------------------------------|--------------------------------------------------------------------------------------------------------------------------------------------------|
| Genome size                  | 6015465 nt                                                                                                                                       |
| Genome GC content            | 0.6722                                                                                                                                           |
| DnaA box distribution        | [ <a href="#">DnaA box distribution</a> ]                                                                                                        |
| OriC length                  | 110 nt                                                                                                                                           |
| OriC AT content              | 0.4818                                                                                                                                           |
| The number of DnaA box       | 3                                                                                                                                                |
| The location of oriC region  | 1743438..1743547 nt                                                                                                                              |
| The location of dnaA gene    | -                                                                                                                                                |
| The extremes of GC disparity | 1721273 nt (minimum), 4895128 nt (maximum)                                                                                                       |
| The extremes of AT disparity | 4894759 nt (minimum), 644303 nt (maximum)                                                                                                        |
| The extremes of RY disparity | 1719935 nt (minimum), 4506867 nt (maximum)                                                                                                       |
| The extremes of MK disparity | 4895128 nt (minimum), 1705512 nt (maximum)                                                                                                       |
| Note                         | Note that the E. coli perfect DnaA box (ttatccaca) was searched for with no more than two mismatches. [ <a href="#">Gene list (zcurve1.02)</a> ] |
| Z-curves                     | [ <a href="#">Figure1</a> ] [ <a href="#">Figure2</a> ]                                                                                          |
| OriC Sequence                | The DnaA boxes identified in the below sequence are capitalized and also marked in bold, if any.                                                 |
|                              | ccgcggtcgccgacaagctcagctaaaaggtccttgcggttgacatggtttttgcggtt <b>GTGGGTAA</b> accagcagcactccgcg <b>TGTGGATCTGTGAAAAA</b> cagctgaa                  |
